# Supplementary material for: Vacancy-modified few-layered GaN crystal for novel high-temperature energy storage
Source: Royal Society of Chemistry journal article supplement (doi:10.1039/d2ta04540k), 2022-01-01
Supplement: d2ta04540k1.pdf [file d2ta04540k1.pdf]

Supporting Information

## **Vacancy-Modified Few-layered GaN Crystal for Novel High-Temperature Energy Storage**

*Songyang Lv<sup>a</sup>, Shouzhi Wang<sup>\*,a</sup>, Tailin Wang<sup>b</sup>, Lei Liu<sup>a</sup>, Jiaoxian Yu<sup>b</sup>, Tianran Dong<sup>a</sup>, Guodong Wang<sup>\*,a</sup>, Zhongxin Wang<sup>a</sup>, Chang Liang<sup>a</sup>, Lili Li<sup>\*,c</sup>, Xiangang Xu<sup>a</sup>, Lei Zhang<sup>\*,a</sup>*

<sup>a</sup>Institute of Novel Semiconductors, State Key Lab of Crystal Materials, Shandong University, Jinan, 250100, P. R. China.

<sup>b</sup>Key Laboratory of Processing and Testing Technology of Glass & Functional Ceramics of Shandong Province, School of Materials Science and Engineering, Qilu University of Technology (Shandong Academy of Sciences), Jinan 250353, P. R. China.

<sup>c</sup>Key Laboratory of Interfacial Physics and Technology, Shanghai Institute of Applied Physics, Chinese Academy of Sciences, Shanghai, 201800, P. R. China.

\*E-mail: wangsz@sdu.edu.cn; guodong9631@sdu.edu.cn; lilili@sinap.ac.cn  
leizhang528@sdu.edu.cn.

**This file includes:**

**S1. Materials**

**S2. Theoretical calculation**

**S3. Characterization Methods**

**S4. Electrochemical Measurements.**

**S5. Calculation of Capacitance Contribution**

**S6. Supplementary Figures S1–S20**

**S7. Table S1–S5**

## S1. Materials

Reagents were purchased from Sinopharm Chemical Reagent Co., Ltd. (Shanghai). All the reagents were used as received.

## S2. Theoretical calculation method

The present calculations were carried out by Vienna Ab initio Simulation Package (VASP) [1,2] implementation of DFT in conjunction with the projector augmented wave (PAW) formalism. Consequently, the H  $1s^1$ , C  $2s^22p^2$ , N  $2s^22p^3$ , O  $2s^22p^4$ , F  $2s^22p^5$ , S  $3s^23p^4$ , and Ga  $4s^2, 3d^{10}, 4p^1$  states are treated as valence electrons. The electronic wave functions were expanded in plane waves using an energy cut off of 500 eV. The convergence criteria of force and energy for the structural relaxation were set at 0.01 eV/Å and  $10^{-5}$  eV. The lattice parameters of primitive hexagonal GaN were  $a=b=3.19$  Å,  $c=5.19$  Å after optimization. Then constructed the  $2 \times 2 \times 2$  supercells to model nitrogen vacancy defect ( $V_N@GaN$ ), as shown in **Figure S16**. The electron exchange and correlation (XC) of the generalized gradient approximation (GGA) functional of Perdew, Burke, and Ernzerhof (PBE) were used to optimize the configurations<sup>[3]</sup>. All the electronic properties of GaN and  $V_N@GaN$  were determined using the screened Heyde-Scuseriae-Ernzerhof (HSE) hybrid functional<sup>[4,5]</sup>. In this approach, the long-range exchange potential and the correlation potential were calculated with the PBE functional, while the short-range exchange potential was calculated by mixing a fraction of the non-local Hartree-Fock exchange with PBE. The screening length and mixing parameter were fixed at 10 Å and 0.25, respectively. Monkhorst-Pack  $k$ -points<sup>[6]</sup> were sampled using a  $4 \times 4 \times 4$  for

the relaxation and total energy and electronic calculations.

Each adsorption model is allowed to interact with  $C_6H_{11}N_2 \cdot C_2F_6NO_4S_2$  (EMImNFT<sub>2</sub>) and the adsorption energy ( $E_{ad}$ ) for species X is defined as follows:

$$E_{ad} = E(\text{surface/X}) - E(\text{surface}) - E(X)$$

where  $E(\text{surface/X})$  is the total energy of the fully relaxed surface/adsorbate system,  $E(\text{surface})$  is the total energy of the relaxed substrate slab, and  $E(X)$  is the total energy of a free adsorbate species (EMImNFT<sub>2</sub>). Negative adsorption energy means effective adsorbate binding.

### **S3. Characterization Methods**

The morphology of the as-collected samples was characterized by investigated by SEM (Hitachi S-4800), TEM (Philips Tecnai 20U-Twin), HRTEM (JEM 2100F), AFM (Nanoscope MultiMode V, Digital Instruments Dimension 3100 system). The crystal structures were obtained by XRD (Bruker diffractometer D8 Advance, Cu K $\alpha$  radiation,  $\lambda = 1.5418 \text{ \AA}$ ), XPS (Thermo ESCALAB 250 Al K $\alpha$  radiation, 1486.8 eV), BET (ASAP 2020 sorptometer), PSD (BJH desorption  $dV/d\log(r)$  plot volume), Raman (Horiba Jobin Yvon with Ar<sup>+</sup> laser 532 nm), PL (at room temperature using 325 nm He–Cd lasers as the excitation source), EPR (JEOL (FA200), at X-band ( $\approx 9$  GHz) at 123.15 K).

To measurement the conductivity of the samples, GaN-2.5h samples were dispersed in ethanol by a sonication process. The mixture was then dropped onto Si substrate with a 300-nm-thick SiO<sub>2</sub> layer. Prior to the photolithography process, the SiO<sub>2</sub>/Si substrate was cleaned by dilute hydrofluoric acid (HF), dilute hydrochloric

acid (HCl), ethanol and deionized water. A typical photolithography process was used to print electrodes on top of nanosheets.

Electrical contact to the GaN-2.5h samples were made by defining source-drain electrodes separated by ~1000 nm with lithography technology (SUSS MicroTec MBJ4) and subsequent evaporation of 50 nm Ti and 50 nm Au. Rapid thermal annealing was carried out at 500 °C for 3 min in the forming gas (10% H<sub>2</sub> in He) to improve the contact and passivate Si-SiO<sub>x</sub> interface traps.<sup>1</sup> The Ti/Au (30/50 nm) electrodes can maintain a good contact interface with nanosheet.

#### **S4. Electrochemical Measurements.**

Electrochemical performance tests were performed with the CHI660E electrochemical workstation. For the three-electrode test system with few-layer GaN crystal as the working electrode (The area of active material on the stainless-steel cloth was 1.5 cm<sup>2</sup>, and the mass loading was about 1 mg cm<sup>-2</sup>), a platinum plate as the counter electrode, Ag/AgCl as the reference electrode and in the electrolyte of 2M KCl solution. The CV and GCD curves were carried out in -0.3 V to 0.7 V under 25°C. In two-electrode measurements, the CV and GCD test data was collected at 0–2.7 V range from 25 °C to 150 °C. The alternating current (AC) EIS spectrum was acquired range from 10<sup>-2</sup> Hz to 10<sup>5</sup> Hz at an open circuit voltage with an AC amplitude of 0.005V. Mott-Schottky (M-S) for the measured frequency of 973Hz.

The area specific capacity of the electrodes in three-electrode test system, is derived from the GCD curve, calculated according to equation 1.

$$C = \frac{I\Delta t}{S\Delta V}$$

Where  $C$  is the specific capacitance ( $\text{F cm}^{-2}$ ) base on the area of the electrode materials,  $I$  is the discharge current (A),  $\Delta t$  is the discharge time (s),  $S$  is the area ( $\text{cm}^2$ ) of the active materials of the single electrode,  $\Delta V$  is the working voltage window (V).

The area specific capacitance for IL-based SC device is calculated from equation 2

$$C = \frac{I\Delta t}{S\Delta V}$$

Where  $C$  is the area specific capacitance ( $\text{F cm}^{-2}$ ) of the IL-based SC device,  $I$  is the discharge current (A),  $\Delta t$  is the discharge time (s),  $S$  is the total area ( $\text{cm}^2$ ) of active material on the IL-based SC device,  $\Delta V$  is the working voltage window (V).

The energy density of the IL-based SC device is calculated by equation 3

$$E = \frac{1}{2}C\Delta V^2$$

Where  $E$  is the energy density ( $\text{mWh cm}^{-2}$ ) of the device,  $C$  is the area specific capacitance ( $\text{mF cm}^{-2}$ ) of IL-based SC device,  $\Delta V$  is the working voltage window (V).

The power density of the IL-based SC device is calculated by equation 4

$$P = \frac{E}{\Delta t}$$

Where  $P$  is the power density ( $\text{mW cm}^{-2}$ ) of the device,  $E$  is the energy density ( $\text{mWh cm}^{-2}$ ),  $\Delta t$  is the discharge time (s).

According to the M-S theory, the calculated electron concentration, was derived from equation 5

$$\frac{1}{C_s^2} = \frac{2}{(\epsilon\epsilon_0 e_0 N_d)} \left( U - U_{fb} - \frac{\kappa_B T}{e_0} \right)$$

Where  $C_s$  is the space charge capacitance per unit area ( $F \text{ cm}^{-2}$ ),  $N_d$  is the electron concentration ( $\text{cm}^{-3}$ ),  $\epsilon$  is the dielectric constant,  $\epsilon_0$  is the permittivity of vacuum ( $F \text{ m}^{-1}$ ),  $e_0$  is the electron charge (C),  $U$  is the applied potential (V),  $U_{fb}$  is the flat band potential (V),  $T$  is the temperature (K), and  $\kappa_B$  is the Boltzmann constant ( $J \text{ K}^{-1}$ ).

### **S5. Calculation of Capacitance Contribution**

Equation 6

$$i(V) = k_1 v + k_2 v^{\frac{1}{2}}$$

We are interested in the percentage of the capacitive current.

## S6. Supplementary Figures S1-S20

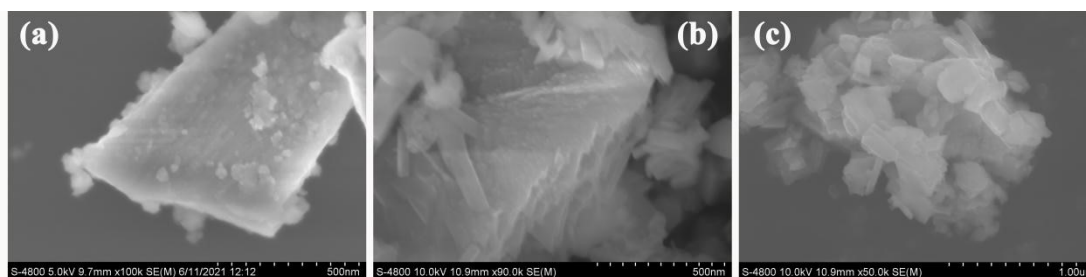

**Figure S1.** The SEM image of GaN crystal under different preparation time.

GaN-1h (a); GaN-2.5h (b) and GaN-3h (c).

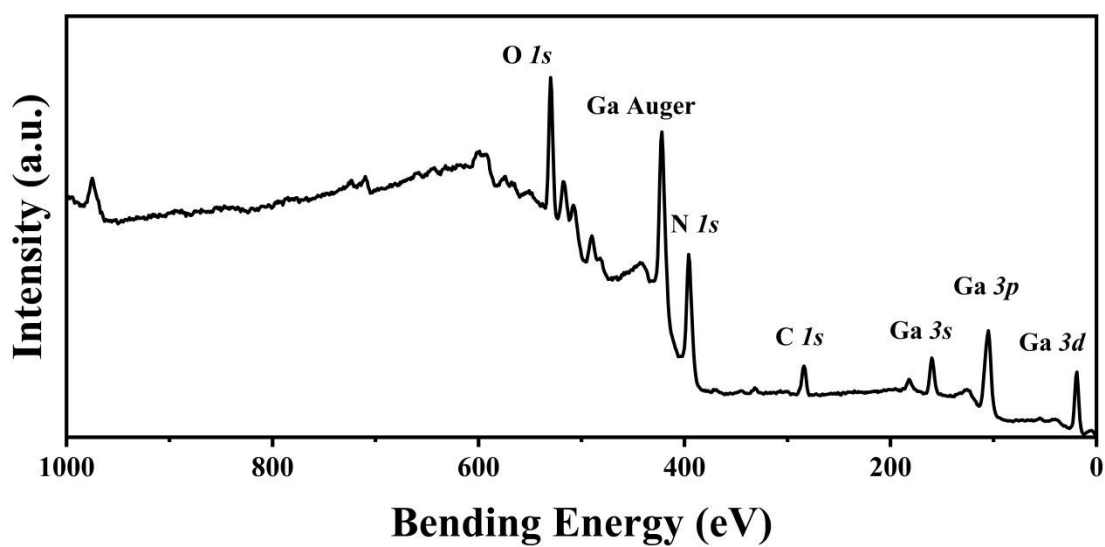

**Figure S2.** The XPS survey of few-layered GaN-2.5h crystal.

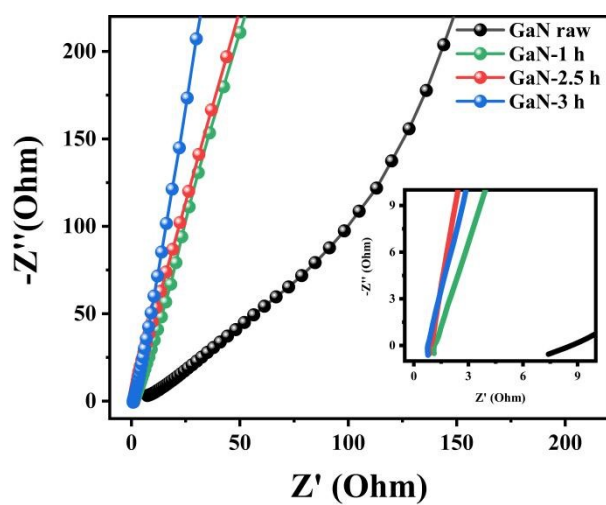

**Figure S3.** Three-electrode EIS tests. Nyquist plots of GaN raw, GaN-1h, GaN-2.5h and GaN-3h electrode.

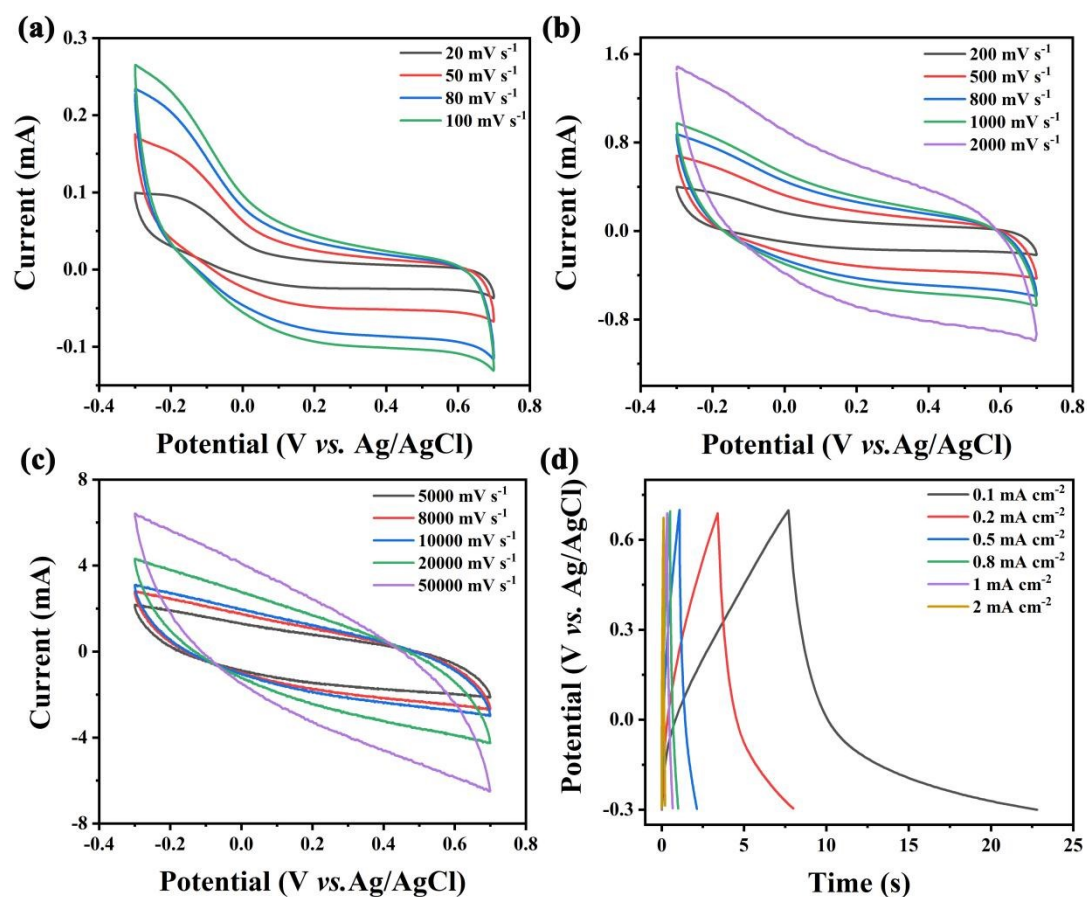

**Figure S4.** Three-electrode electrochemical performance of GaN raw. CV profiles of the electrode at scan rates ranging from  $20 \text{ mV s}^{-1}$  to  $100 \text{ mV s}^{-1}$  (a); from  $200 \text{ mV s}^{-1}$  to  $2,000 \text{ mV s}^{-1}$  (b) and from  $5,000 \text{ mV s}^{-1}$  to  $50,000 \text{ mV s}^{-1}$  (c); corresponding GCD curves, operated with current densities ranging from  $0.1 \text{ mA cm}^{-2}$  to  $2 \text{ mA cm}^{-2}$ . (d).



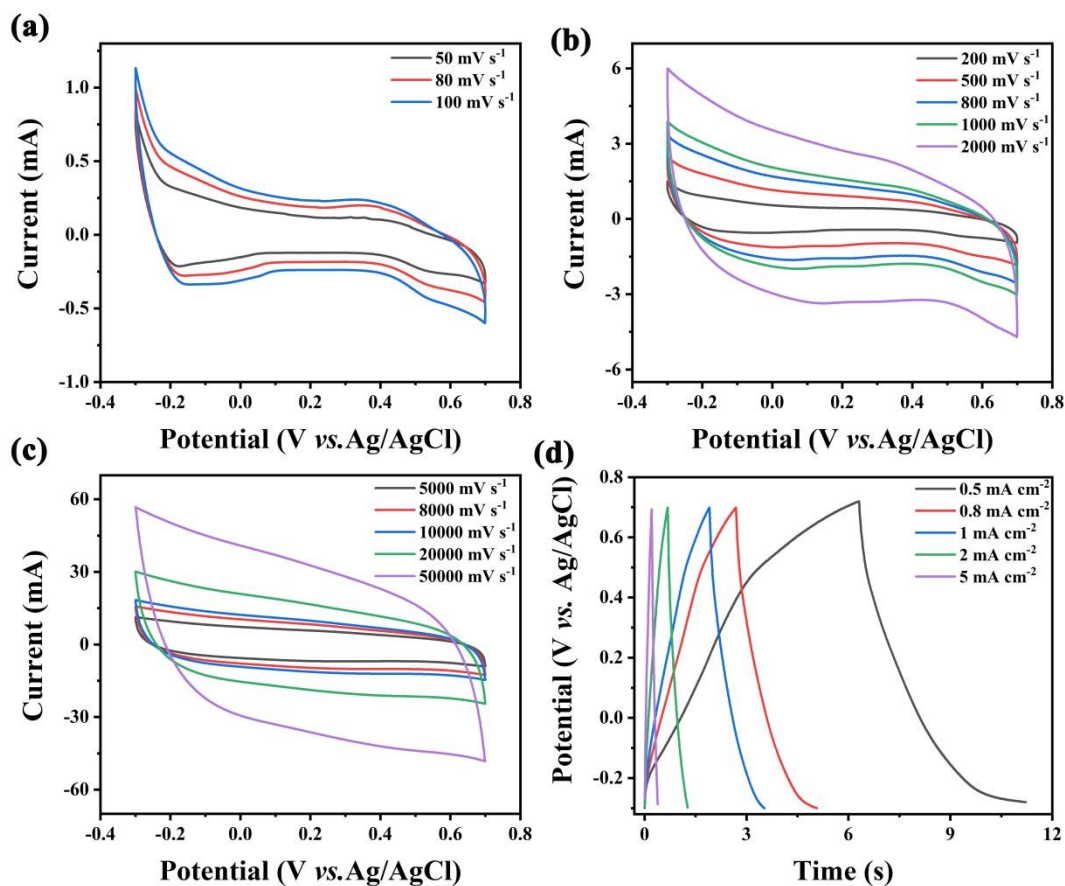

**Figure S5.** Three-electrode electrochemical performance of GaN-1h. CV profiles of the electrode at scan rates ranging from 50 mV s<sup>-1</sup> to 100 mV s<sup>-1</sup> (a); from 200 mV s<sup>-1</sup> to 2,000 mV s<sup>-1</sup> (b) and from 5,000 mV s<sup>-1</sup> to 50,000 mV s<sup>-1</sup> (c); corresponding GCD curves, operated with current densities ranging from 0.5 mA cm<sup>-2</sup> to 5 mA cm<sup>-2</sup> (d).

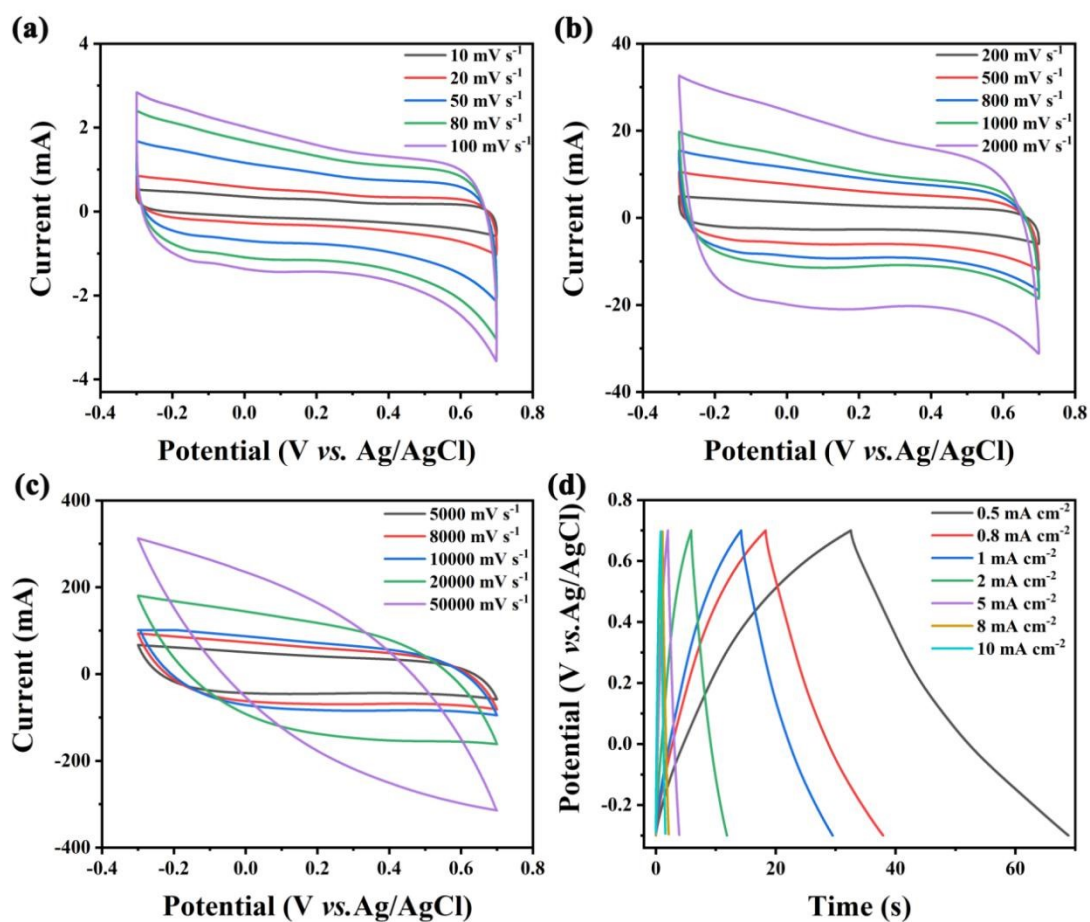

**Figure S6.** Three-electrode electrochemical performance of GaN-2.5h. CV profiles of the electrode at scan rates ranging from 10 mV s<sup>-1</sup> to 100 mV s<sup>-1</sup> (a); from 200 mV s<sup>-1</sup> to 2,000 mV s<sup>-1</sup> (b) and from 5,000 mV s<sup>-1</sup> to 50,000 mV s<sup>-1</sup> (c); corresponding GCD curves, operated with current densities ranging from 0.5 mA cm<sup>-2</sup> to 10 mA cm<sup>-2</sup> (d).

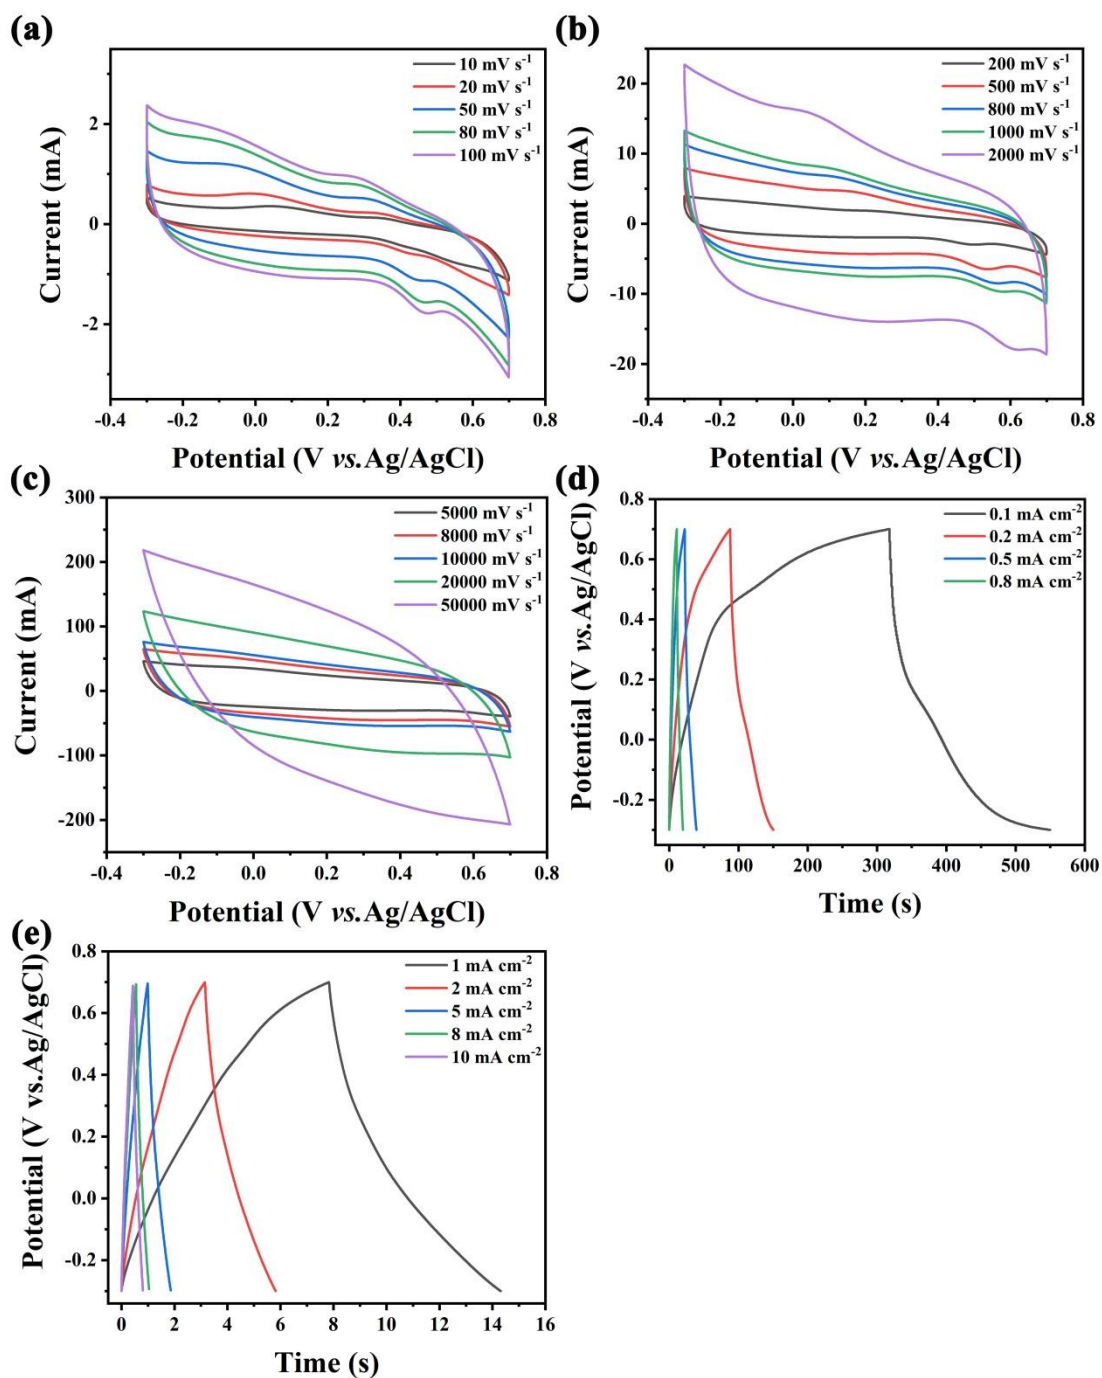

**Figure S7.** Three-electrode electrochemical performance of GaN-3h. CV profiles of the electrode at scan rates ranging from 10 mV s<sup>-1</sup> to 100 mV s<sup>-1</sup> (a); from 200 mV s<sup>-1</sup> to 2,000 V s<sup>-1</sup> (b); from 5,000 mV s<sup>-1</sup> to 50,000 mV s<sup>-1</sup> (c); corresponding GCD curves, operated with current densities ranging from 0.1 mA cm<sup>-2</sup> to 0.8 mA cm<sup>-2</sup> (d) and from 1 mA cm<sup>-2</sup> to 10 mA cm<sup>-2</sup> (e).

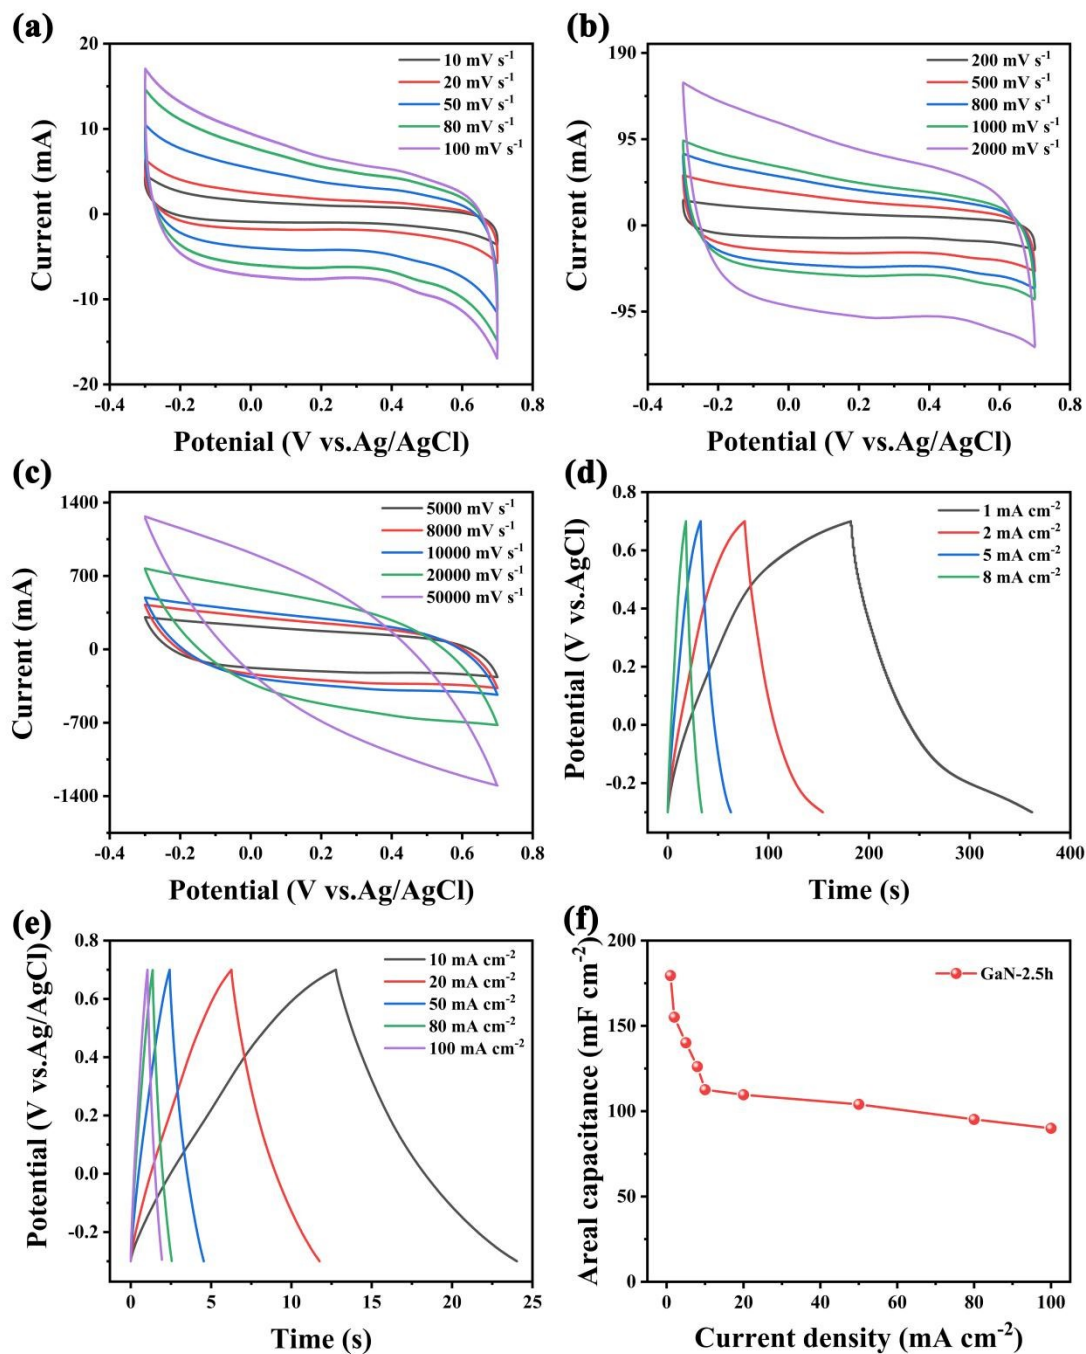

**Figure S8.** Three-electrode electrochemical performance of GaN-2.5h with high mass loading. CV profiles of the electrode at scan rates ranging from 10 mV s<sup>-1</sup> to 100 mV s<sup>-1</sup> (a); from 200 mV s<sup>-1</sup> to 2,000 mV s<sup>-1</sup> (b) and from 5,000 mV s<sup>-1</sup> to 50,000 mV s<sup>-1</sup> (c); corresponding GCD curves, operated with current densities ranging from 1 mA cm<sup>-2</sup> to 8 mA cm<sup>-2</sup> (d) and from 10 mA cm<sup>-2</sup> to 100 mA cm<sup>-2</sup>; areal capacitance as a function of current density (e).

To further meet the requirement of the industrial application, the electrochemical behaviors of the few-layered GaN-2.5h electrode with high mass loading are studied (Figure S8, Supporting Information). The initial shape of CV curves is preserved as the scan rate expanded to  $50 \text{ V s}^{-1}$ , which signifying prominent reversibility and rapid reaction kinetics. Similarly, the GCD measurements have also verified this result. It is observed that the areal capacitance retains 50% (from  $179.5 \text{ mF cm}^{-2}$  at  $1 \text{ mA cm}^{-2}$  to  $90 \text{ mF cm}^{-2}$  at  $100 \text{ mA cm}^{-2}$ ) even the current density is increased by a factor of 100.

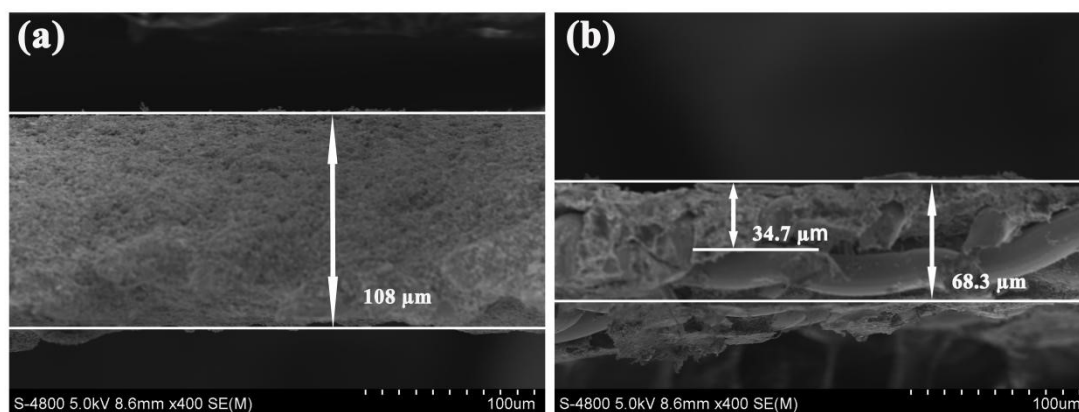

**Figure S9.** The cross-section SEM image of GaN-2.5h electrode film with the mass loading is approximately  $6 \text{ mg cm}^{-2}$  (a) and  $1 \text{ mg cm}^{-2}$  (b), respectively.

The cross-section SEM of the electrode film suggestion that the electrode material is uniformly coated on the stainless steel mesh. It can be seen that with the increase of the mass loading, the thickness of the electrode becomes thicker.

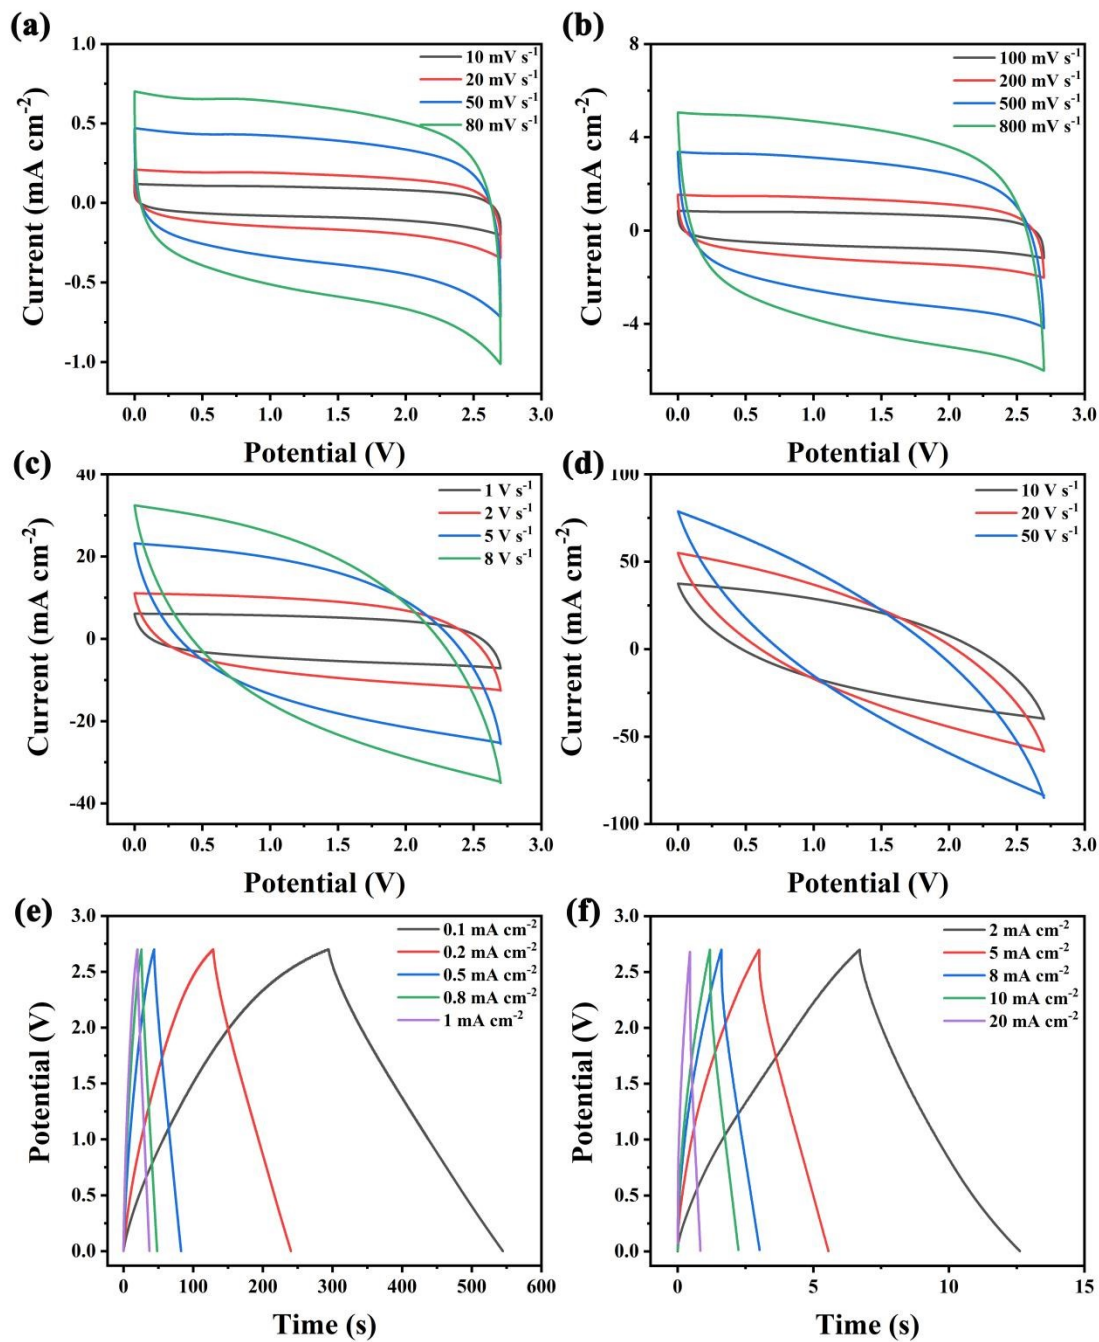

**Figure S10.** IL-based SC device electrochemical performance of GaN at 25 °C. CV profiles of the device at scan rates ranging from 10 mV s<sup>-1</sup> to 80 mV s<sup>-1</sup> (a); from 100 mV s<sup>-1</sup> to 800 mV s<sup>-1</sup> (b); from 1 V s<sup>-1</sup> to 8 V s<sup>-1</sup> (c) and from 10 V s<sup>-1</sup> to 50 V s<sup>-1</sup> (d); corresponding GCD curves, operated with current densities ranging from 0.1 mA cm<sup>-2</sup> to 1 mA cm<sup>-2</sup> (e) and from 2 mA cm<sup>-2</sup> to 20 mA cm<sup>-2</sup> (f).

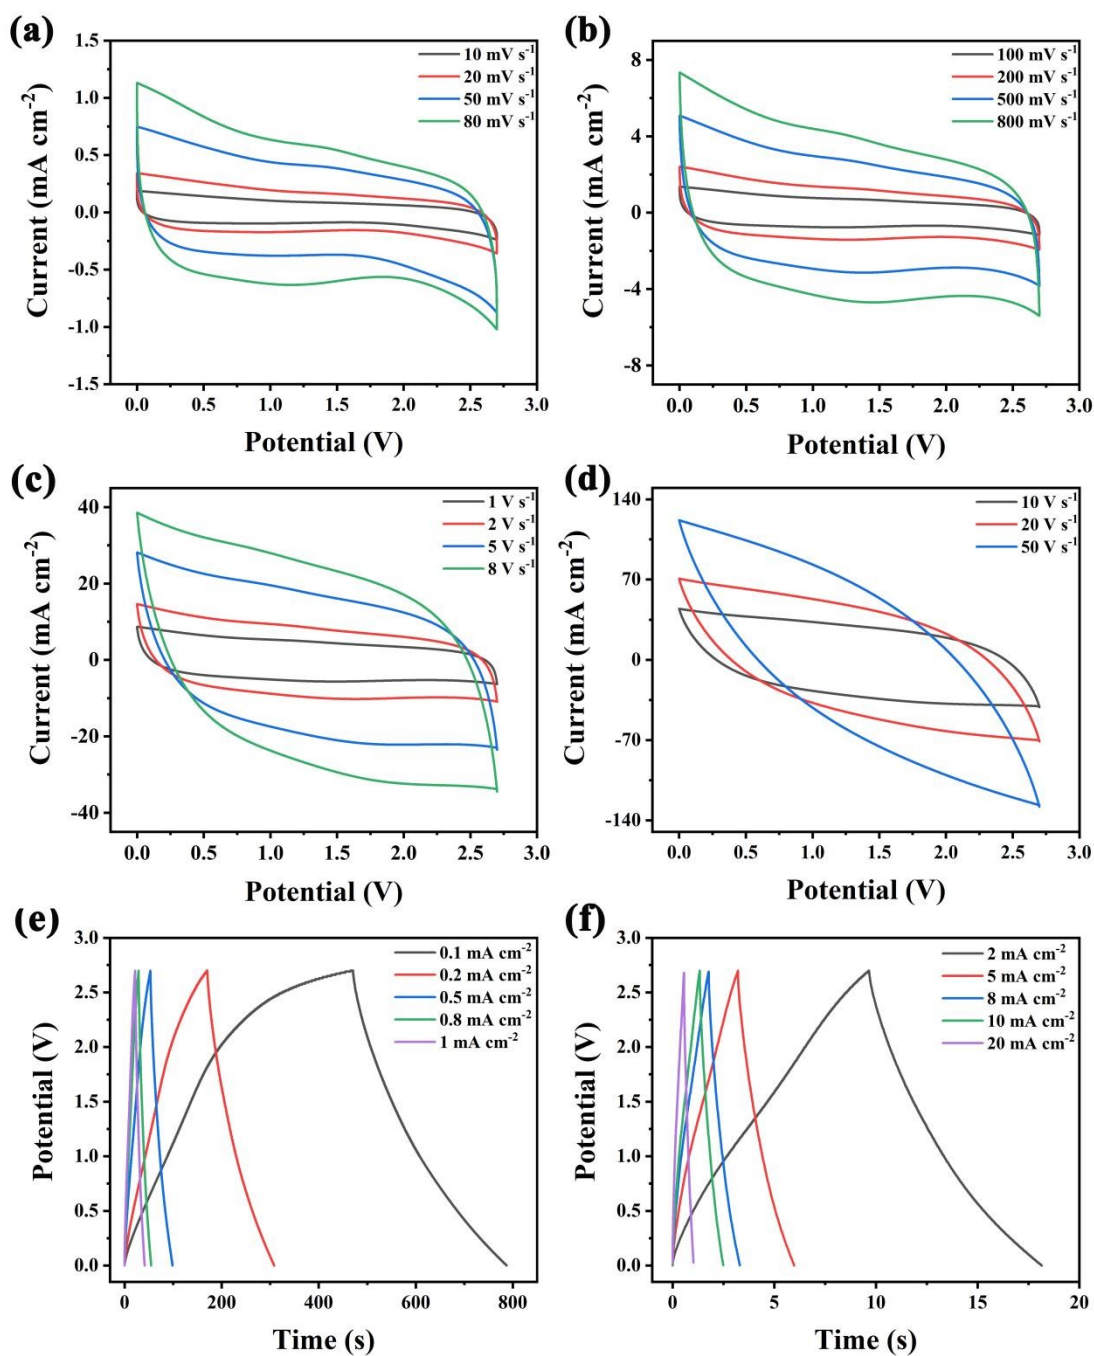

**Figure S11.** IL-based SC device electrochemical performance of GaN at 60 °C. CV profiles of the device at scan rates ranging from 10 mV s<sup>-1</sup> to 80 mV s<sup>-1</sup> (a); from 100 mV s<sup>-1</sup> to 800 mV s<sup>-1</sup> (b); from 1 V s<sup>-1</sup> to 8 V s<sup>-1</sup> (c) and from 10 V s<sup>-1</sup> to 50 V s<sup>-1</sup> (d); corresponding GCD curves, operated with current densities ranging from 0.1 mA cm<sup>-2</sup> to 1 mA cm<sup>-2</sup> (e) and from 2 mA cm<sup>-2</sup> to 20 mA cm<sup>-2</sup> (f).

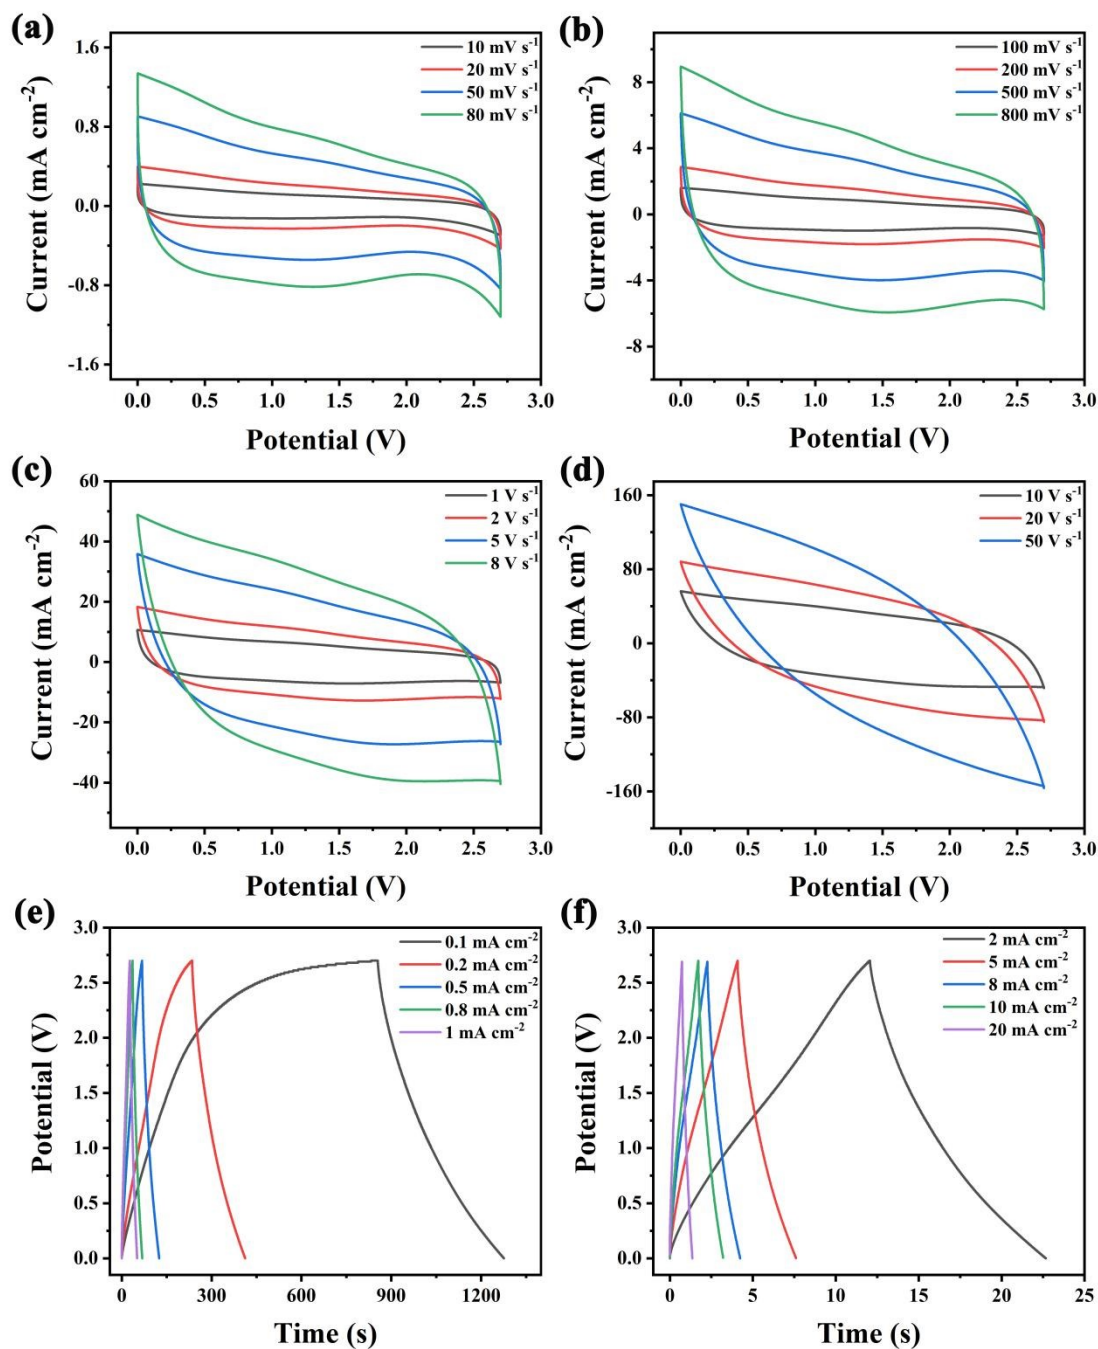

**Figure S12.** IL-based SC device electrochemical performance of GaN at 80 °C. CV profiles of the device at scan rates ranging from 10 mV s<sup>-1</sup> to 80 mV s<sup>-1</sup> (a); from 100 mV s<sup>-1</sup> to 800 mV s<sup>-1</sup> (b); from 1 V s<sup>-1</sup> to 8 V s<sup>-1</sup> (c) and from 10 V s<sup>-1</sup> to 50 V s<sup>-1</sup> (d); corresponding GCD curves, operated with current densities ranging from 0.1 mA cm<sup>-2</sup> to 1 mA cm<sup>-2</sup> (e) and from 2 mA cm<sup>-2</sup> to 20 mA cm<sup>-2</sup> (f).



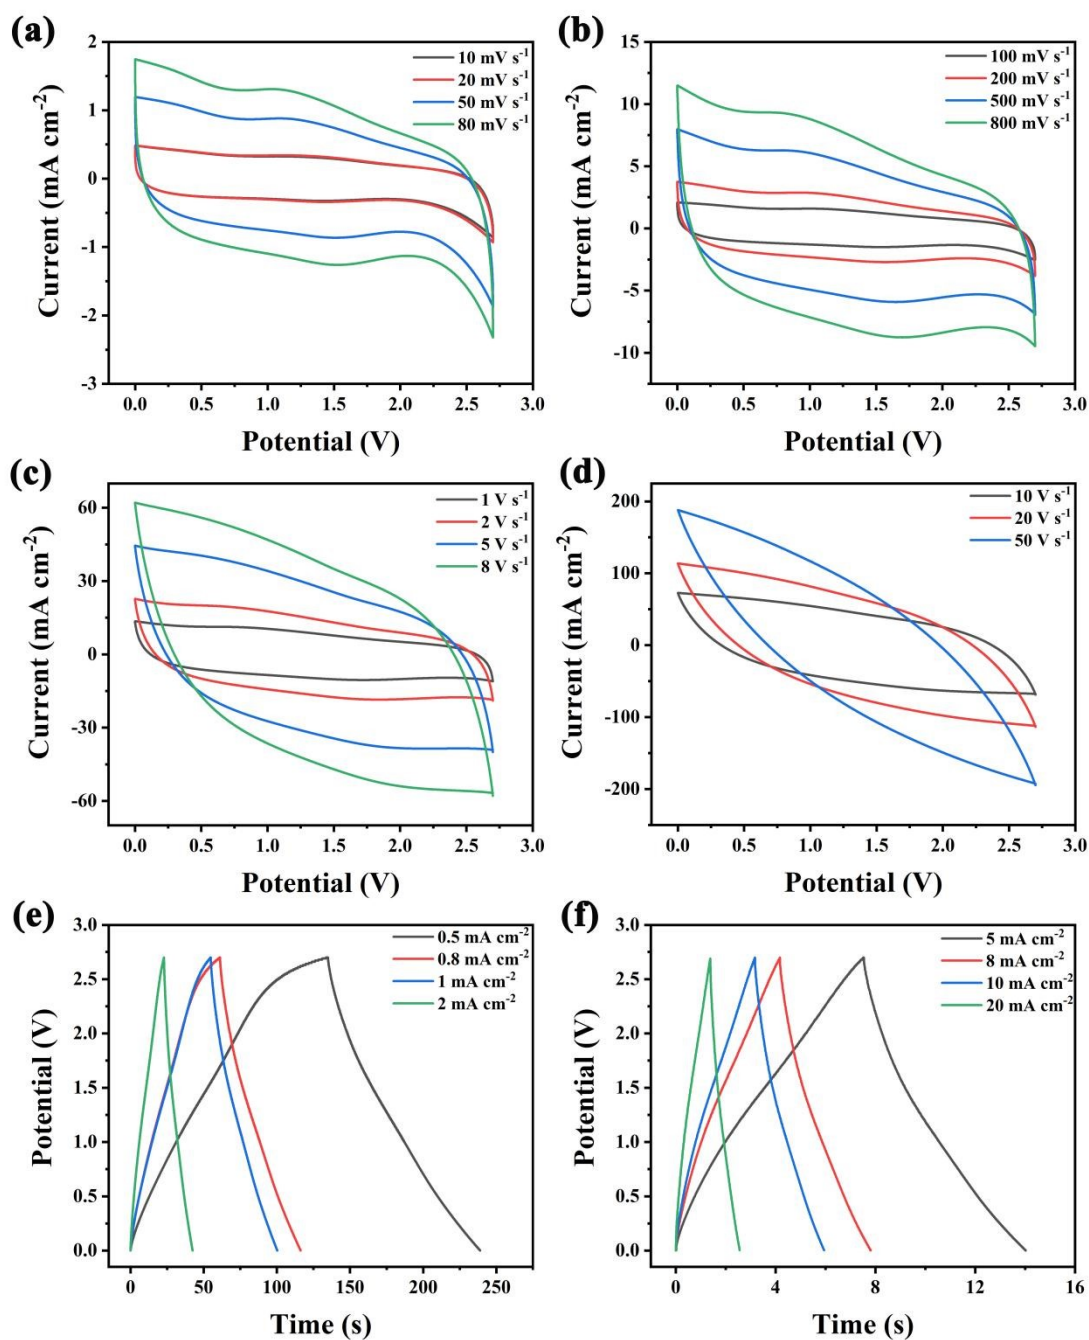

**Figure S13.** IL-based SC device electrochemical performance of GaN at 100 °C. CV profiles of the device at scan rates ranging from 10 mV s<sup>-1</sup> to 80 mV s<sup>-1</sup> (a); from 100 mV s<sup>-1</sup> to 800 mV s<sup>-1</sup> (b); from 1 V s<sup>-1</sup> to 8 V s<sup>-1</sup> (c) and from 10 V s<sup>-1</sup> to 50 V s<sup>-1</sup> (d); corresponding GCD curves, operated with current densities ranging from 0.5 mA cm<sup>-2</sup> to 2 mA cm<sup>-2</sup> (e) and from 5 mA cm<sup>-2</sup> to 20 mA cm<sup>-2</sup> (f).

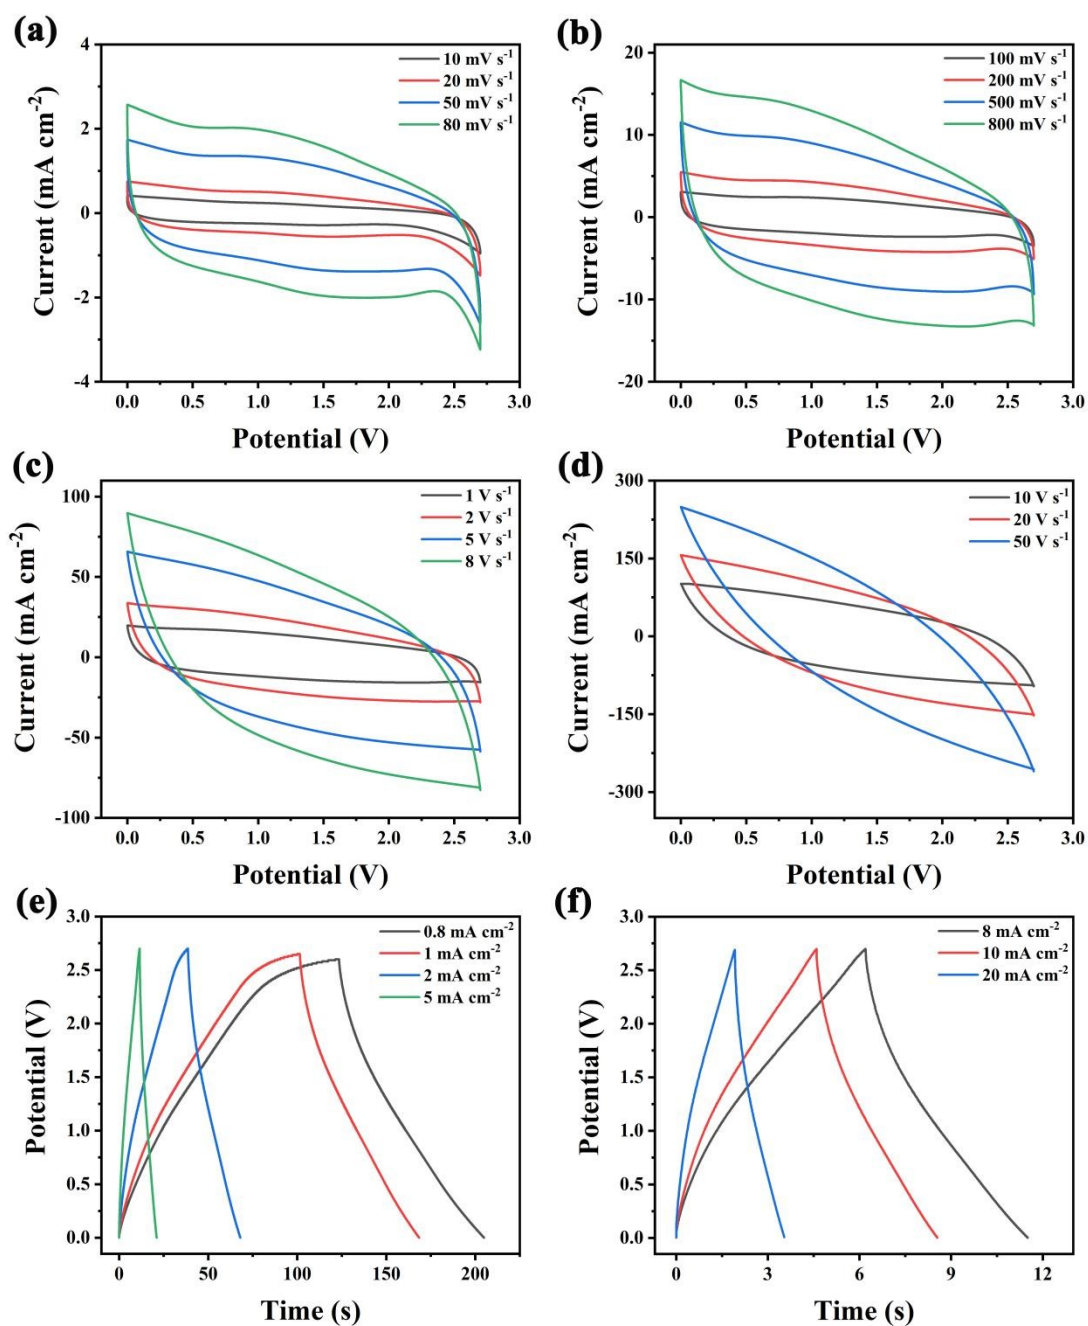

**Figure S14.** IL-based SC device electrochemical performance of GaN at 130 °C. CV profiles of the device at scan rates ranging from 10 mV s<sup>-1</sup> to 80 mV s<sup>-1</sup> (a); from 100 mV s<sup>-1</sup> to 800 mV s<sup>-1</sup> (b); from 1 V s<sup>-1</sup> to 8 V s<sup>-1</sup> (c) and from 10 V s<sup>-1</sup> to 50 V s<sup>-1</sup> (d); corresponding GCD curves, operated with current densities ranging from 0.8 mA cm<sup>-2</sup> to 5 mA cm<sup>-2</sup> (e) and from 8 mA cm<sup>-2</sup> to 20 mA cm<sup>-2</sup> (f).

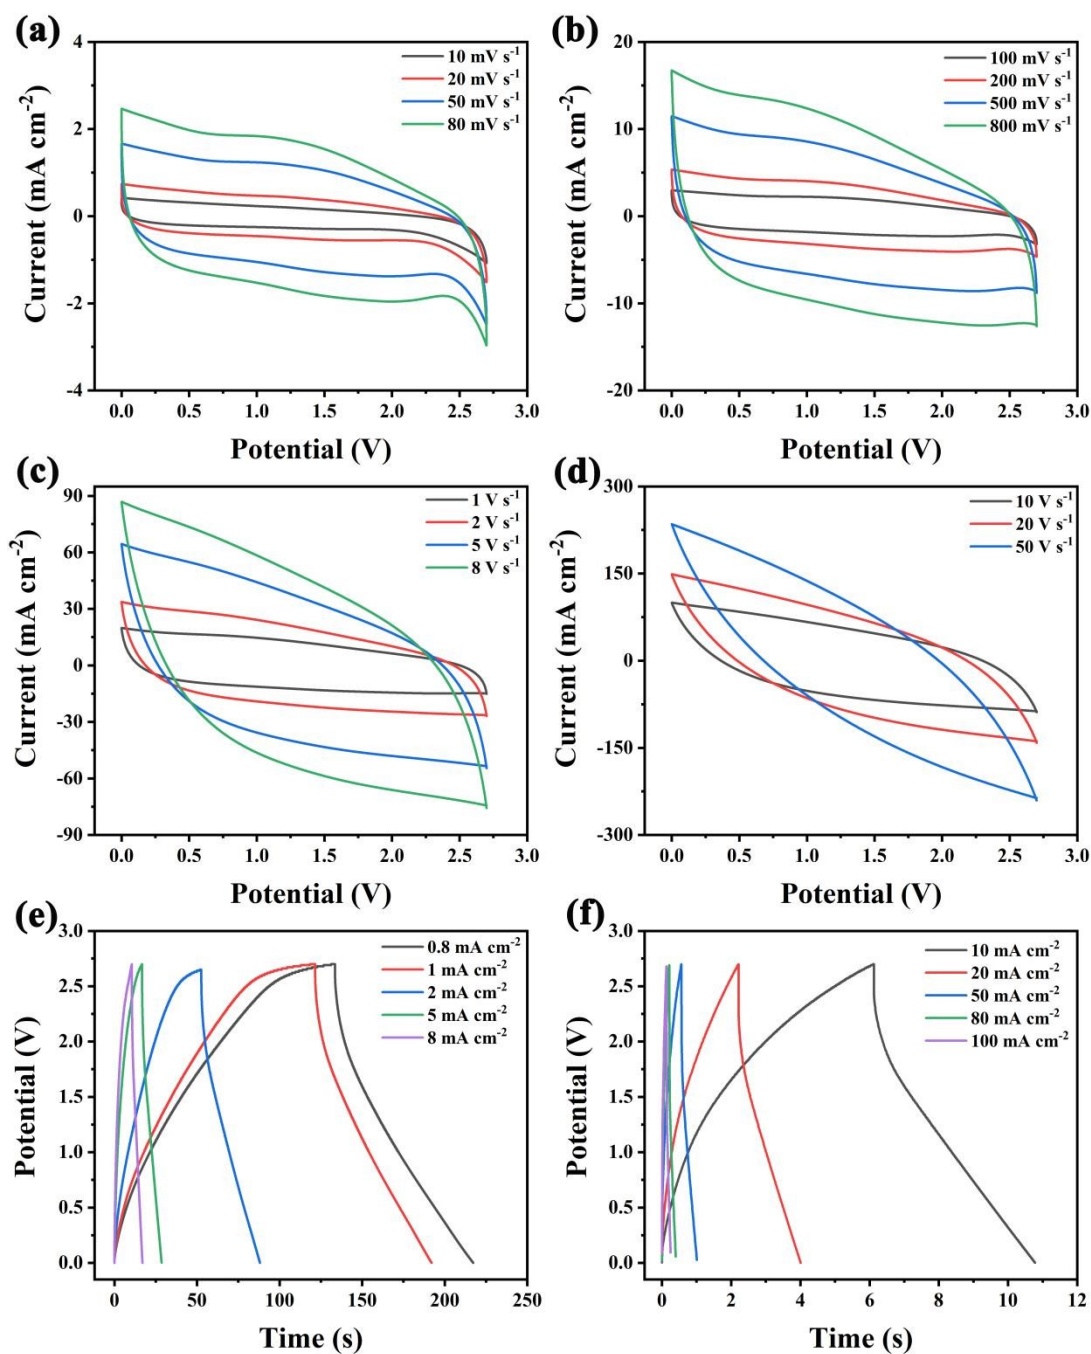

**Figure S15.** IL-based SC device electrochemical performance of GaN at 150 °C. CV profiles of the device at scan rates ranging from 10 mV s<sup>-1</sup> to 80 mV s<sup>-1</sup> (a); from 100 mV s<sup>-1</sup> to 800 mV s<sup>-1</sup> (b); from 1 V s<sup>-1</sup> to 8 V s<sup>-1</sup> (c) and from 10 V s<sup>-1</sup> to 50 V s<sup>-1</sup> (d); corresponding GCD curves, operated with current densities ranging from 0.8 mA cm<sup>-2</sup> to 8 mA cm<sup>-2</sup> (e) and from 10 mA cm<sup>-2</sup> to 100 mA cm<sup>-2</sup> (f).

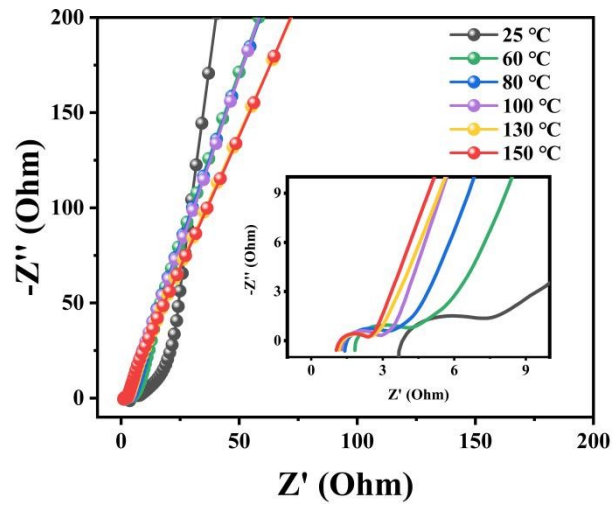

**Figure S16.** Few-layered GaN IL-based SC devices Nyquist plots at 25 °C, 60 °C, 80 °C, 100 °C, 130 °C, 150 °C.

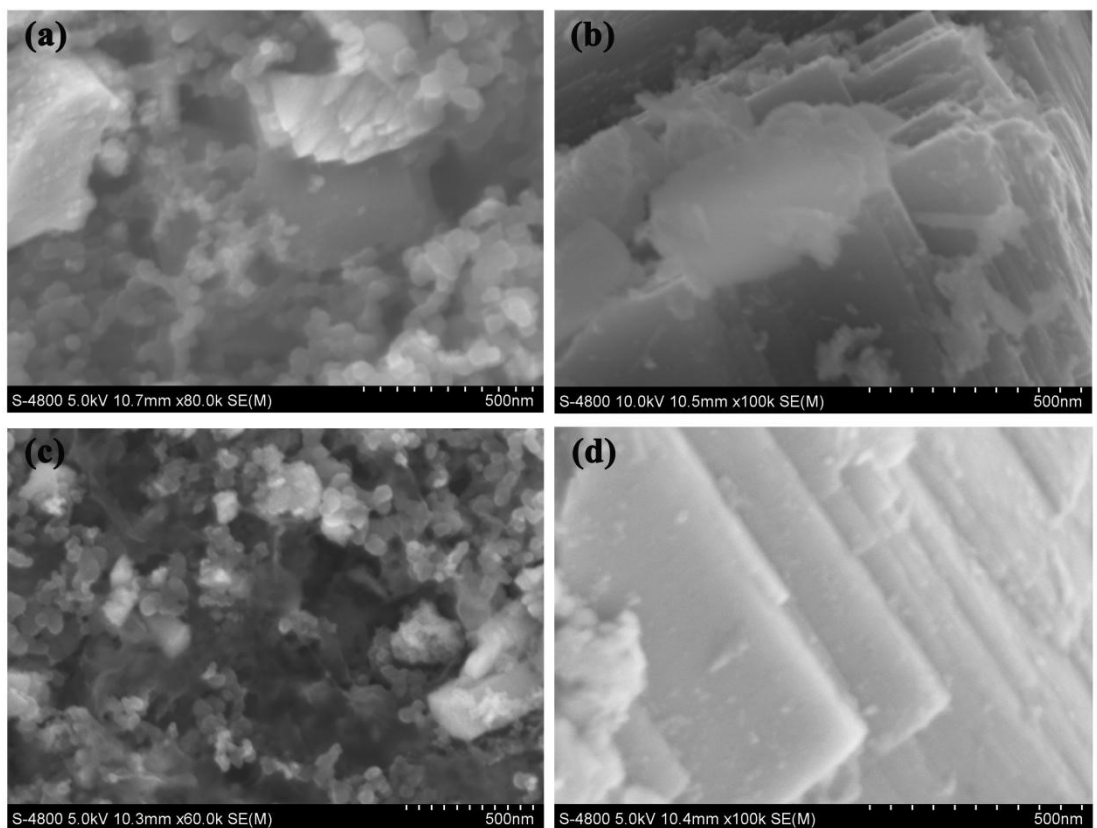

**Figure S17.** SEM images of the IL-based SC devices GaN electrode of 150 °C before (a,b) and after (c,d) 10,000 cycles at 8 mA cm<sup>-2</sup>

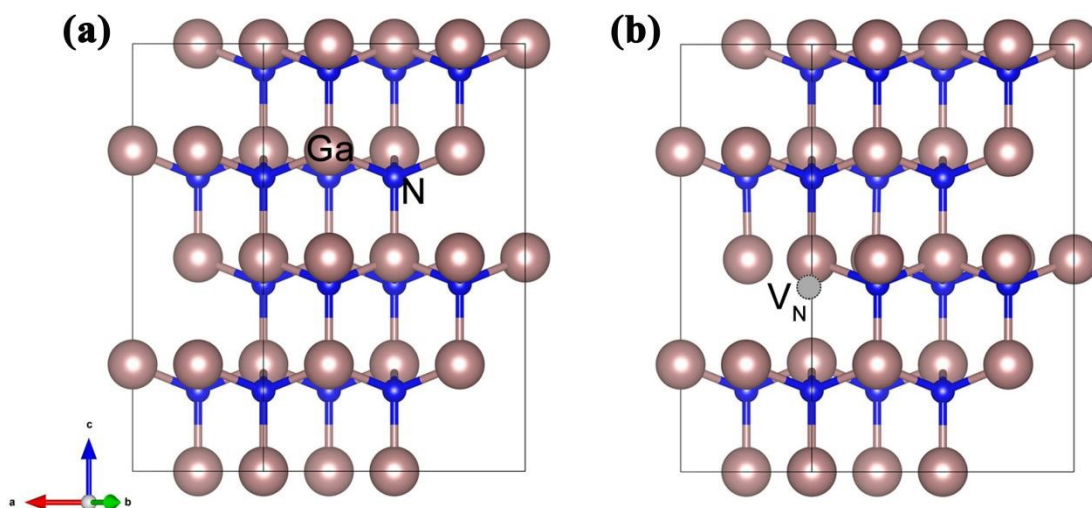

**Figure S18.** The optimized structures of GaN bulk (a) and the  $V_N$ @GaN bulk (b).

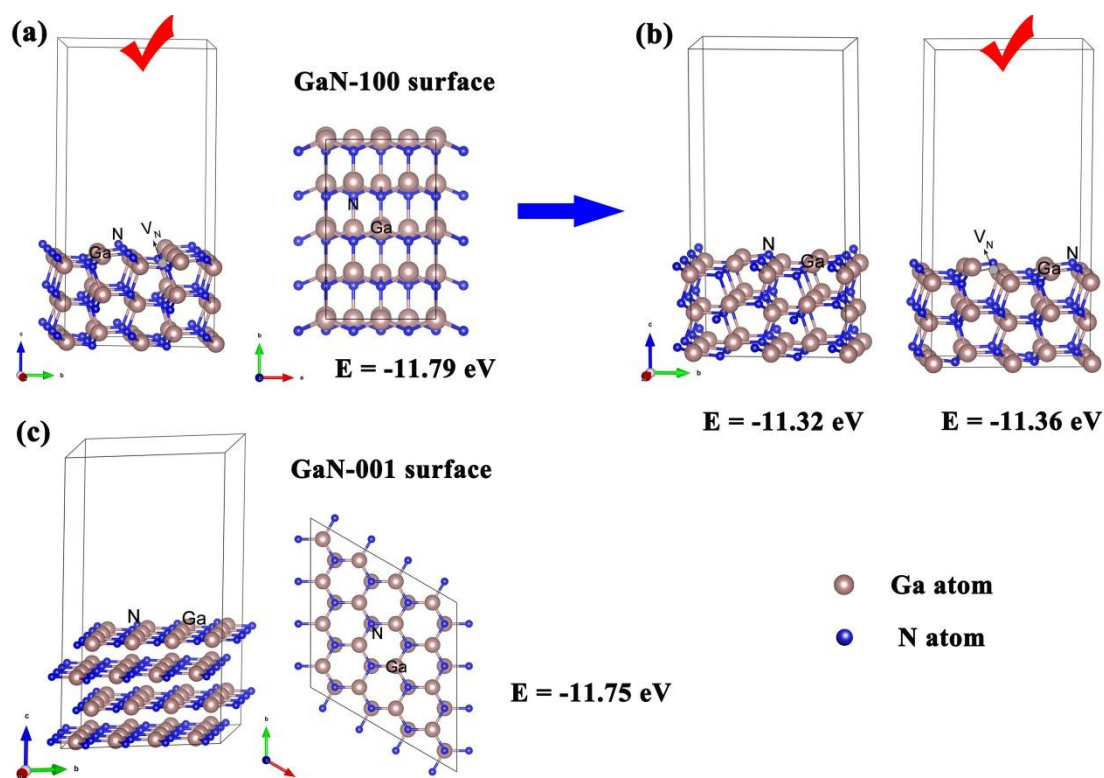

**Figure S19.** (a) Perfect GaN (100) surface side view (left) and top view (right); (b) the optimized structures of the  $V_N$  defects in different environments on the GaN-100 surface; (c) perfect GaN (001) surface side view (left) and top view (right).

To determine the optimal adsorption surface for  $C_6H_{11}N_2 \cdot C_2F_6NO_4S_2$  (EMImNFT<sub>2</sub>) on GaN, we first built the GaN-100 and GaN-001 surfaces in **Figure**

**S19a and S19c.** The thickness of vacuum spacing was  $\sim 15\text{\AA}$  in the  $z$ -direction to prevent spurious interactions. Compared with GaN-001 surface ( $-11.75\text{ eV}$ ), GaN-100 surface has lower energy of  $-11.79\text{ eV}$ , so we constructed a series of EMImNFT<sub>2</sub> adsorption models based on the stable GaN-100 surface. For the  $V_N$  defects on the GaN-100 surface ( $V_N@GaN-100$  surface), the energies of  $V_N$  in different environments were  $-11.32\text{ eV}$  and  $-11.36\text{ eV}$ , respectively, as shown in **Figure S19b** left and right. Thus, a series of models for EMImNFT<sub>2</sub> adsorption, were constructed on the stable  $V_N@GaN-100$  surface (**Figure S19b**).

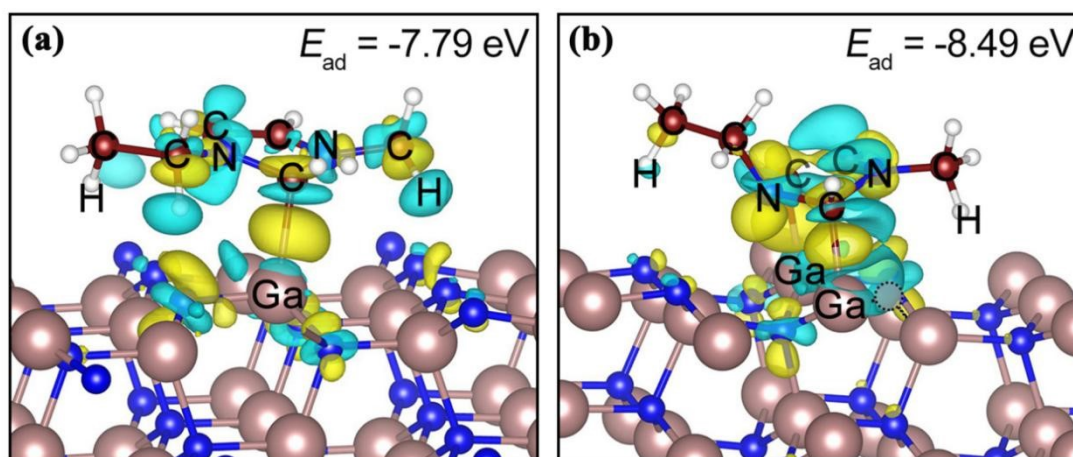

**Figure S20.** Calculated adsorption energies for electrolyte cation (EMIm<sup>+</sup>).

**Table S1.** Comparison of electrochemical performance of GaN with wide-bandgap semiconductor based electrode reported in the literatures of aqueous electrolytes at 25 °C.

| Material                   | Specific capacitance                                      | Stability           | Ref.                                                      |
|----------------------------|-----------------------------------------------------------|---------------------|-----------------------------------------------------------|
| <b>GaN nanocrystalline</b> | <b>34.43 mF cm<sup>-2</sup> at 0.5 mA cm<sup>-2</sup></b> | <b>97.8%-10,000</b> | <b>This work</b>                                          |
| GaN MM                     | 23.67 mF cm <sup>-2</sup> at 10 mV s <sup>-1</sup>        | 98% - 30,000        | <i>Adv. Mater.</i> <b>2016</b> , 28, 3768                 |
| GaN PM                     | 21.22 mF cm <sup>-2</sup> at 0.1 mA cm <sup>-2</sup>      | 99% -10,000         | <i>Sci. Rep.</i> <b>2017</b> , 7, 40063                   |
| SiC NWs arrays             | 23.6 mF cm <sup>-2</sup> at 0.2 mA cm <sup>-2</sup>       | /                   | <i>Adv. Funct. Mater.</i> <b>2021</b> , 31, 2008901       |
| SiC NWs                    | 9.56 mF cm <sup>-2</sup> at 0.2 mA cm <sup>-1</sup>       | /                   | <i>Energy Stor. Mater.</i> <b>2020</b> , 27, 261          |
| SiC NWs                    | 23.6 mF cm <sup>-2</sup> at 10 mV s <sup>-1</sup>         | 94.8%- 10,000       | <i>Adv. Energy Mater.</i> <b>2019</b> , 9, 1900073        |
| SiC/G-HNF                  | 0.41 mF cm <sup>-2</sup> at 5 μA cm <sup>-2</sup>         | 86% - 5,000         | <i>Small</i> <b>2018</b> , 14, 1801857                    |
| SiC nanochannels           | 14.8 mF cm <sup>-2</sup> at 10 mV s <sup>-1</sup>         | 96% -10,000         | <i>Mater. Horiz.</i> <b>2018</b> , 5, 883                 |
| N doped SiC NWs            | 4.8 mF cm <sup>-2</sup> at 10 mV s <sup>-1</sup>          | 98% -10,000         | <i>ACS. Nano.</i> <b>2015</b> , 9, 8054                   |
| SiC NWs                    | 2.33 μF cm <sup>-2</sup> at 100 mV s <sup>-1</sup>        | /                   | <i>ACS Appl. Mater. Interfaces</i> <b>2015</b> , 7, 26658 |
| SiC NWs                    | 240 μF cm <sup>-2</sup> at 100 mV s <sup>-1</sup>         | 95% - 200,000       | <i>J. Power Sources</i> <b>2013</b> , 230, 298            |
| SiC NWs array              | 350 μF cm <sup>-2</sup> at 0.5 V s <sup>-1</sup>          | ~100%-10,000        | <i>Nanoscale</i> , <b>2013</b> , 5, 4114                  |
| SiC NWs                    | 23 mF cm <sup>-2</sup> at 50 mV s <sup>-1</sup>           | 90% -10,000         | <i>J. Power Sources</i> , <b>2013</b> , 243, 648          |
| SiC/C                      | 734 μF cm <sup>-2</sup> at 10 mV s <sup>-1</sup>          | 91.2% -20,000       | <i>J. Mater. Sci. Technol.</i> <b>2022</b> , 110, 178     |
| SiC NWs                    | 46.7 mF cm <sup>-2</sup> at 0.1 V s <sup>-1</sup>         | ~100%-10,000        | <i>J. Alloys Compd.</i> <b>2020</b> , 827, 154168         |
| C/PSiC                     | 325 mF cm <sup>-2</sup> at 1mA cm <sup>-2</sup>           | 83% - 5,000         | <i>Nano Lett.</i> <b>2014</b> , 14, 1843                  |

**Table S2.** Fitting report of Figure 3f insert based on a R(CR)W equivalent circuit.

| index | fixed | parameter | start    | end      | rel. Std. error (%) |
|-------|-------|-----------|----------|----------|---------------------|
| 1     | 0     | Rs        | 0.8562   | 0.8562   | 1.384               |
| 2     | 0     | C         | 0.007263 | 0.007081 | 1.600               |
| 3     | 0     | Rct       | 0.495    | 0.495    | 1.197               |
| 4     | 0     | W         | 0.1649   | 0.1649   | 6.337               |

**Table S3.** Comparison of electrochemical performance of high mass loading electrode reported in the literatures.

| Material             | Mass loading             | Max Scan rate          | Capacitance retention                                          | Ref.                                                  |
|----------------------|--------------------------|------------------------|----------------------------------------------------------------|-------------------------------------------------------|
| GaN crystal          | ~6 mg cm <sup>-2</sup>   | 50 V s <sup>-1</sup>   | 50% (from 1 mA cm <sup>-2</sup> to 100 mA cm <sup>-2</sup> )   | This work                                             |
| CNT@MnO <sub>2</sub> | 6.6 mg cm <sup>-2</sup>  | 150 mV s <sup>-1</sup> | ~46% (from 1 mA cm <sup>-2</sup> to 15 mA cm <sup>-2</sup> )   | <i>Chem. Eng. J.</i> , <b>2019</b> , 368, 525.        |
| ZnNiCo LDH           | 7 mg cm <sup>-2</sup>    | 60 mV s <sup>-1</sup>  | 52.3% (from 3 mA cm <sup>-2</sup> to 30 mA cm <sup>-2</sup> )  | <i>J. Mater. Chem. A</i> , <b>2019</b> , 7, 11826     |
| NiCo LDH             | 5.11 mg cm <sup>-2</sup> | 100 mV s <sup>-1</sup> | ~22% (from 5 mA cm <sup>-2</sup> to 30 mA cm <sup>-2</sup> )   | <i>Electrochim. Acta</i> , <b>2020</b> , 362, 137081  |
| MnO <sub>2</sub> /C  | 25 mg cm <sup>-2</sup>   | 1 V s <sup>-1</sup>    | 11% (from 0.5 mA cm <sup>-2</sup> to 40 mA cm <sup>-2</sup> )  | <i>Adv. Funct. Mater.</i> , <b>2021</b> , 31, 2009632 |
| WC@MnO <sub>2</sub>  | 12.8 mg cm <sup>-2</sup> | 50 mV s <sup>-1</sup>  | ~37.5% (from 1 mA cm <sup>-2</sup> to 15 mA cm <sup>-2</sup> ) | <i>Small</i> <b>2022</b> , 18, 2201307                |
| NiO/NF               | 17.4 mg cm <sup>-2</sup> | 100 mV s <sup>-1</sup> | 35.9% (from 2 mA cm <sup>-2</sup> to 100 mA cm <sup>-2</sup> ) | <i>Electrochim. Acta</i> , <b>2021</b> , 390, 138772  |



**Table S4.** Comparison of electrochemical performance of GaN IL-based SC devices with others high temperature SC electrodes reported in the literatures.

| Material                   | Temperature (°C) | Voltage window  | Max Scan rate                 | Specific capacitance                                      | Energy density                     | Power density                   | Capacitance retain-cycle | Ref.                                                        |
|----------------------------|------------------|-----------------|-------------------------------|-----------------------------------------------------------|------------------------------------|---------------------------------|--------------------------|-------------------------------------------------------------|
| <b>GaN nanocrystalline</b> | <b>150</b>       | <b>0 -2.7 V</b> | <b>50 V s<sup>-1</sup></b>    | <b>52.58 mF cm<sup>-2</sup> at 0.8 mA cm<sup>-2</sup></b> | <b>13.3 μWh cm<sup>-2</sup></b>    | <b>67.5 mW cm<sup>-2</sup></b>  | <b>86.2% -10,000</b>     | <b>This work</b>                                            |
| SiC NWs arrays             | 150              | 0-2.5 V         | 200 mV s <sup>-1</sup>        | 18.5 mF cm <sup>-2</sup> at 2 mA cm <sup>-2</sup>         | /                                  | /                               | 80% - 10,000             | <i>Adv. Funct. Mater.</i> <b>2021</b> , <i>31</i> , 2008901 |
| Carbon cloth               | 120              | 0-1.8 V         | 5 mV s <sup>-1</sup>          | 531.5 mF cm <sup>-2</sup> at 4 mA cm <sup>-2</sup>        | 283.9 μWh cm <sup>-2</sup> (25 °C) | 0.9 mW cm <sup>-2</sup> (25 °C) | 79.3% - 75               | <i>J. Mater. Chem. A</i> , <b>2019</b> , <i>7</i> , 20398   |
| SiC NWs                    | 60               | 0-0.6 V         | 2 V s <sup>-1</sup>           | 19.3 mF cm <sup>-2</sup> at 5 mA cm <sup>-2</sup>         | 0.64 μWh cm <sup>-2</sup> (20 °C)  | 1.1 mW cm <sup>-2</sup> (20 °C) | 90% - 10,000             | <i>J. Power Sources</i> , <b>2013</b> , <i>243</i> , 648    |
| TiC fibre                  | 65               | 0-1.6 V         | 1V s <sup>-1</sup>            | 192 F g <sup>-1</sup> at 5 A g <sup>-1</sup>              | 15.6 Wh kg <sup>-1</sup> (25 °C)   | 760 W kg <sup>-1</sup>          | 85% - 50,000             | <i>Energy Environ. Sci.</i> , <b>2015</b> , <i>8</i> , 1559 |
| TiC                        | 65               | 0-3 V           | 1 V s <sup>-1</sup>           | 2.94 F cm <sup>-3</sup> at 57.6 mA cm <sup>-2</sup>       | 3 mWh cm <sup>-3</sup>             | 2.9 mW cm <sup>-3</sup>         | 98% - 75,000             | <i>J. Mater. Chem. A</i> , <b>2016</b> , <i>4</i> , 18717   |
| TiC NWs                    | 60               | 0-3 V           | 400 V s <sup>-1</sup> (25 °C) | 185 F g <sup>-1</sup> at 2 A g <sup>-1</sup>              | 18.2 kWh kg <sup>-1</sup>          | 1.6 kW kg <sup>-1</sup>         | 96.8% - 50,000           | <i>Small</i> <b>2017</b> , <i>13</i> , 1602742              |
| Carbon                     | 100              | 0-2.5 V         | 50 mV s <sup>-1</sup>         | 150 mF cm <sup>-2</sup> at 200 mV s <sup>-1</sup>         | /                                  | /                               | 92% - 25,000             | <i>Energy Stor. Mater.</i> <b>2019</b> , <i>21</i> , 439    |
| laser-induced graphene     | 100              | 0-2.5 V         | 10 mV s <sup>-1</sup>         | 3.7 mF cm <sup>-2</sup> at 10μA cm <sup>-2</sup>          | 4.5 μWh cm <sup>-2</sup>           | 90.5 μW cm <sup>-2</sup>        | 75% - 3,200              | <i>Electrochim. Acta</i> <b>2020</b> , <i>357</i> , 136838  |
| FeOOH/CC                   | 200              | 0-2.5 V         | 100 mV s <sup>-1</sup>        | 115 mF cm <sup>-2</sup> at 3 mA cm <sup>-2</sup>          | 1.44 mWh cm <sup>-3</sup>          | 49 mW cm <sup>-3</sup>          | 70% - 5,000              | <i>J. Mater. Chem. A</i> <b>2016</b> , <i>4</i> , 8316      |
| GO                         | 100              | 0-0.8 V         | 50 mV s <sup>-1</sup>         | 96.2 mF cm <sup>-2</sup> at 0.223 mA cm <sup>-2</sup>     | 8.55 μWh cm <sup>-2</sup>          | 0.0853 mW cm <sup>-2</sup>      | 75.3% - 3,000            | <i>Nano Energy</i> <b>2019</b> , <i>64</i> 103938           |
| Ni foam                    | 80               | 0-3.5 V         | 20 V s <sup>-1</sup>          | 365 μF cm <sup>-2</sup> at 1 V s <sup>-1</sup>            | 0.05 μWh cm <sup>-2</sup> (25 °C)  | 0.5 mW cm <sup>-2</sup> (25 °C) | 93.5% - 3,000 (25 °C)    | <i>Electrochim. Acta</i> <b>2018</b> , <i>267</i> , 15      |

|                                          |     |           |                        |                                                      |                                 |                                 |                     |                                                          |
|------------------------------------------|-----|-----------|------------------------|------------------------------------------------------|---------------------------------|---------------------------------|---------------------|----------------------------------------------------------|
| MnO <sub>2</sub> //Graphene              | 80  | 0-1.4 V   | 100 mV s <sup>-1</sup> | 132 mF cm <sup>-2</sup> at 2 mA cm <sup>-1</sup>     | 50 μWh cm <sup>-2</sup> (25 °C) | 6.4 mW cm <sup>-2</sup> (25 °C) | 93% - 5,000 (25 °C) | <i>Nano Energy</i> <b>2017</b> , 38, 127                 |
| PEDOTS-RuO <sub>2</sub> @PEDOTS          | 75  | 0-1.5 V   | 50 mV s <sup>-1</sup>  | 202.5 mF cm <sup>-2</sup> at 50 mV s <sup>-1</sup>   | 22.9 μWh cm <sup>-2</sup>       | /                               | 74.3% - 2,000       | <i>Nano Energy</i> <b>2018</b> , 50, 106                 |
| commercial AC                            | 150 | 0-1.5 V   | 100 mV s <sup>-1</sup> | 120 F g <sup>-1</sup> at 30 mA cm <sup>-2</sup>      | 34.8 Wh kg <sup>-1</sup>        | 8.2 kW kg <sup>-1</sup>         | 83% - 1,000         | <i>Chem. Comm</i> , <b>2019</b> , 55, 15081              |
| rGO                                      | 120 | -0.5-0.5V | 100 mV s <sup>-1</sup> | 18.6 mF cm <sup>-2</sup> at 50 mV s <sup>-1</sup>    | 0.06 mWh cm <sup>-3</sup>       | 0.9 W cm <sup>-3</sup>          | 93% - 100,000       | <i>ACS. Nano.</i> <b>2015</b> , 9, 8069                  |
| Bio-AC                                   | 115 | 0-1.3 V   | 100 mV s <sup>-1</sup> | 172 F g <sup>-1</sup>                                | 7.2 Wh kg <sup>-1</sup>         | 137.5 W kg <sup>-1</sup>        | 63% - 100,000       | <i>Electrochim. Acta</i> <b>2018</b> , 286, 148          |
| BCN nanotube                             | 100 | 0-3 V     | 100 mV s <sup>-1</sup> | 37.6 mF cm <sup>-2</sup> at 10 mA cm <sup>-2</sup>   | 1.3 mWh cm <sup>-3</sup>        | 24.9 mW cm <sup>-3</sup>        | 86.1% - 200         | Small, 2021, 17, 2102899                                 |
| rGO                                      | 100 | 0-1 V     | 1 V s <sup>-1</sup>    | 6.8 F cm <sup>-3</sup> at 50 mV s <sup>-1</sup>      | 0.837 mWh cm <sup>-3</sup>      | 400 mW cm <sup>-3</sup>         | /                   | <i>ACS Appl. Energy Mater.</i> <b>2020</b> , 3, 5693     |
| CNT/PANI                                 | 100 | 0-1 V     | 100 mV s <sup>-1</sup> | 221 mF cm <sup>-2</sup> at 3.33 mA cm <sup>-2</sup>  | /                               | /                               | 93% - 5,000 (25 °C) | <i>J. Mater. Chem. A</i> , <b>2021</b> , 9, 12051        |
| AC                                       | 90  | 0-1 V     | 10 mV s <sup>-1</sup>  | 272 F g <sup>-1</sup> at 1 A g <sup>-1</sup>         | 37.7 Wh kg <sup>-1</sup>        | 678.6 W kg <sup>-1</sup>        | ~100% -1,000        | <i>J. Power Sources</i> <b>2018</b> , 379, 60            |
| AC                                       | 90  | 0-2.4 V   | 200 mV s <sup>-1</sup> | 21.93 F g <sup>-1</sup> at 1 A g <sup>-1</sup>       | 21.63 Wh kg <sup>-1</sup>       | 1.13 kW kg <sup>-1</sup>        | ~100% -18,000       | <i>J. Colloid Interface Sci.</i> <b>2022</b> , 608, 1162 |
| AC                                       | 85  | 0-2.7 V   | 80 mV s <sup>-1</sup>  | 79.1 F g <sup>-1</sup> at 10 mV s <sup>-1</sup>      | 0.03 mWh cm <sup>-3</sup>       | 3.08 mW cm <sup>-3</sup>        | 73% - 5,000         | <i>J. Power Sources</i> <b>2020</b> , 447, 227390        |
| Activated Graphene                       | 80  | 0-3 V     | 10 mV s <sup>-1</sup>  | 28.4 mF cm <sup>-2</sup> at 0.05 mA cm <sup>-2</sup> | 54.6 mWh cm <sup>-3</sup>       | 4.6 W cm <sup>-3</sup>          | 88% - 2,000         | <i>Energy Environ. Sci.</i> , <b>2018</b> , 11, 2001     |
| La <sub>2</sub> O <sub>3</sub> Nanosheet | 70  | 0-1 V     | 30 mV s <sup>-1</sup>  | 100 F g <sup>-1</sup> at 30 mV s <sup>-1</sup>       | /                               | /                               | 67% - 2,000         | <i>Electrochim. Acta</i> <b>2018</b> , 260, 449          |

|                                    |    |            |                        |                                                   |                                  |                                 |                       |                                                   |
|------------------------------------|----|------------|------------------------|---------------------------------------------------|----------------------------------|---------------------------------|-----------------------|---------------------------------------------------|
| TiC@crystalline PPy                | 60 | -1-0.6 V   | 400 mV s <sup>-1</sup> | 326 F g <sup>-1</sup> at 400 mV s <sup>-1</sup>   | /                                | /                               | 40% - 5,000           | <i>J. Power Sources</i> <b>2015</b> , 274, 1118   |
| AC                                 | 60 | 0-1.8 V    | 50 mV s <sup>-1</sup>  | 262 F g <sup>-1</sup>                             | 138.6 Wh kg <sup>-1</sup>        | 18 kW kg <sup>-1</sup>          | 80% - 5,500           | <i>Nano Energy</i> <b>2021</b> , 90, 106500       |
| Carbon                             | 60 | 0-2.5 V    | 100 mV s <sup>-1</sup> | 182 F g <sup>-1</sup> at 5 mV s <sup>-1</sup>     | /                                | /                               | 84.9% - 10,000        | <i>Energy Stor. Mater.</i> <b>2019</b> , 22, 323  |
| SiC nanochannel                    | 60 | -0.1-0.7 V | 200 mV s <sup>-1</sup> | 14.8 mF cm <sup>-2</sup> at 10 mV s <sup>-1</sup> | /                                | /                               | 96.8% - 10,000        | <i>Mater. Horiz.</i> , <b>2018</b> , 5, 883       |
| TiC                                | 60 | 0-3 V      | 400 V s <sup>-1</sup>  | 81.3 F cm <sup>-3</sup> at 30 A g <sup>-1</sup>   | 13.1 Wh kg <sup>-1</sup>         | 20.2 kW kg <sup>-1</sup>        | 96.8% - 50,000        | <i>Small</i> <b>2017</b> , 13, 1602742            |
| MoS <sub>2</sub> @TiO <sub>2</sub> | 60 | -0.5-0.5 V | 50 mV s <sup>-1</sup>  | 60 F g <sup>-1</sup> at 0.5 A g <sup>-1</sup>     | 21 Wh kg <sup>-1</sup>           | 1.35 kW kg <sup>-1</sup>        | 98% - 2,000 (25 °C)   | <i>J. Alloys Compd</i> <b>2021</b> , 883, 160705  |
| Graphene                           | 60 | 0-1.5 V    | 500 mV s <sup>-1</sup> | 274 F g <sup>-1</sup> at 2.4 A g <sup>-1</sup>    | 11.5 Wh kg <sup>-1</sup> (25 °C) | 48.2 W kg <sup>-1</sup> (25 °C) | 69% - 5,000           | <i>J. Power Sources</i> <b>2021</b> , 488, 229461 |
| AC                                 | 50 | 0-3V       | 20 mV s <sup>-1</sup>  | 111 F g <sup>-1</sup> at 0.1 A g <sup>-1</sup>    | 9.0 Wh kg <sup>-1</sup>          | 15.3 kW kg <sup>-1</sup>        | <97% - 1,000          | <i>J. Mater. Chem. A</i> , <b>2015</b> , 3, 18860 |
| NiCo-MOF                           | 50 | 0-1.8 V    | 100 mV s <sup>-1</sup> | 147.8 F g <sup>-1</sup> at 1 A g <sup>-1</sup>    | 77.7 Wh kg <sup>-1</sup> (25 °C) | 450 W kg <sup>-1</sup> (25 °C)  | 92.6% - 4,000 (25 °C) | <i>J. Mater. Chem. A</i> , <b>2019</b> , 7, 4998  |
| Graphene Thin sheet                | 45 | 0-1 V      | 200 mV s <sup>-1</sup> | 99 F g <sup>-1</sup> at 1 mA cm <sup>-2</sup>     | 3.44 Wh kg <sup>-1</sup>         | 99.2 kW kg <sup>-1</sup>        | 92% - 5,000           | <i>Nano energy</i> <b>2014</b> , 8, 231           |

Remarks:

NWs: nanowires

AC: Activated carbon

rGO: Reduced graphene oxide

GO: Graphene oxide

**Table S5.** Comparison of the N atoms and Ga atoms band charge around the  $V_N$  active site of the perfect GaN surface and  $V_N@GaN$ .

| Band Charge       | N <sub>4</sub> | N <sub>3</sub> | Ga <sub>4</sub> | <b>Ga<sub>3</sub></b> | N <sub>2</sub> | N <sub>1</sub> | <b>Ga<sub>2</sub></b> | <b>Ga<sub>1</sub></b> | N <sub>6</sub> | N <sub>5</sub> |
|-------------------|----------------|----------------|-----------------|-----------------------|----------------|----------------|-----------------------|-----------------------|----------------|----------------|
| GaN surface       | -1.46          | -1.47          | +1.43           | <b>+1.42</b>          | -1.46          | -1.48          | <b>+1.51</b>          | <b>+1.50</b>          | -1.46          | -1.47          |
| $V_N@GaN$ surface | -1.46          | -1.47          | +1.44           | <b>+0.76</b>          | -1.15          |                | <b>+0.93</b>          | <b>+0.78</b>          | -1.45          | -1.44          |

## References

- [1] G. Kresse, J. Furthmüller, *Phys. Rev. B*, **1996**, *54*, 11169.
- [2] G. Kresse, D. Joubert, *Phys. Rev. B*, **1999**, *59*, 1758.
- [3] J. P. Perdew, K. Burke, M. Ernzerhof, *Phys. Rev. Lett.*, **1996**, *77*, 3865.
- [4] J. Heyd, G. E. Scuseria, M. Ernzerhof, *J. Chem. Phys.*, **2003**, *118*, 8207.
- [5] A. V. Krukau, O. A. Vydrov, A. F. Izmaylov, G. E. Scuseria, *J. Chem. Phys.*, **2006**, *125*, 224106.
- [6] H. J. Monkhorst, J. D. Pack, *Phys Rev B*, **1976**, *13*, 5188.
